# Supplementary material for: Effects of silybin supplementation on nutrient digestibility, hematological parameters, liver function indices, and liver-specific mi-RNA concentration in dogs
Source: PubMed Central journal article supplement (PMC8235871; doi:10.1186/s12917-021-02929-3), 2021-06-26
Supplement: 12917_2021_2929_MOESM1_ESM.pdf [file 12917_2021_2929_MOESM1_ESM.pdf]

**Effects of silybin supplementation on nutrient digestibility, hematological parameters, liver function indices, and liver-specific mi-RNA concentration in dogs**

Maciej Gogulski,<sup>1,2,3</sup> Adam Cieślak,<sup>4</sup> Julia Grabska,<sup>4</sup> Marie Ardois,<sup>4</sup> Małgorzata Pomorska-Mól,<sup>1</sup>

Paweł A Kołodziejcki,<sup>5</sup> Kacper Libera,<sup>1</sup> Viola Stropfová,<sup>3</sup> Małgorzata Szumacher-Strabel<sup>4\*</sup>

<sup>1</sup>Department of Preclinical Sciences and Infectious Diseases, Poznań University of Life Sciences, Wołyńska 35, 60-637, Poznań, Poland

<sup>2</sup>University Center for Veterinary Medicine, Poznań University of Life Sciences, Szydlowska 43, 60-637, Poznań, Poland

<sup>3</sup>Centre of Biosciences, Institute of Animal Physiology, Soltesovej 4-6, 040-01 Kosice, Slovakia

<sup>4</sup>Department of Animal Nutrition, Poznań University of Life Sciences, Wołyńska 33, 60-637 Poznań, Poland

<sup>5</sup>Department of Animal Physiology, Biochemistry and Biostructure, Poznań University of Life Sciences, Wołyńska 35, 60-637 Poznań, Poland

\*Corresponding author; E-mail: [malgorzata.szumacher@up.poznan.pl](mailto:malgorzata.szumacher@up.poznan.pl);

address: Department of Animal Nutrition, Poznań University of Life Sciences, Wołyńska 33, 60-637 Poznań, Poland

email addresses:

MG: [maciej.gogulski@up.poznan.pl](mailto:maciej.gogulski@up.poznan.pl); AC: [adam.cieslak@up.poznan.pl](mailto:adam.cieslak@up.poznan.pl), JG: [julsgrabska@gmail.com](mailto:julsgrabska@gmail.com);

MA: [marieardois@icloud.com](mailto:marieardois@icloud.com); MPM: [malgorzata.pomorska@up.poznan.pl](mailto:malgorzata.pomorska@up.poznan.pl);

PAK: [pawel.kolodziejcki@up.poznan.pl](mailto:pawel.kolodziejcki@up.poznan.pl); KL: [kacper.libera@up.poznan.pl](mailto:kacper.libera@up.poznan.pl); VS: [stropfv@saske.sk](mailto:stropfv@saske.sk);

MSS: [malgorzata.szumacher@up.poznan.pl](mailto:malgorzata.szumacher@up.poznan.pl)

**Supplementary Table 1** Characteristic of dogs involved in EXP2

---

|                                               |                                              |                                      |
|-----------------------------------------------|----------------------------------------------|--------------------------------------|
| Mix <sup>1</sup> (6 yrs, 12 kg, M)            | Caucasian Shepherd dog<br>(2 yrs, 60 kg, M)  | Yorkshire Terrier (7 mnths, 3 kg, F) |
| Pitbull terrier (8 mnths, 20 kg, F)           | German Shepherd dog<br>(11 yrs, 40 kg, F)    | Mix <sup>1</sup> (8 yrs, 25 kg, M)   |
| Golden retriever (11 yrs, 30 kg, M)           | Beagle (2 yrs, 15 kg, F)                     | Cane Corso (5 yrs, 50 kg, F)         |
| Whippet (5 mnths, 5 kg, F)                    | Bernese Mountain Dog<br>(10 mnths, 35 kg, M) | Beagle (5 yrs, 14 kg, F)             |
| White Swiss Shepherd Dog<br>(7 yrs, 30 kg, F) | Pug (11 mnths, 9 kg, M)                      | Husky (7 yrs, 30 kg, M)              |

---

<sup>1</sup>Mix – Mixed-breed dog

The additional information are given in parentheses (age, body weight, sex M-male, F-female)

**Supplementary Table 2** Hepatoprotectant dosage regimen according to the manufacturer

| Body weight  | Less than 3 kg | 3 kg to 5 kg | 6 kg to 10 kg   | 11 kg to 15 kg | 16 kg to 20 kg  | Above 20 kg |
|--------------|----------------|--------------|-----------------|----------------|-----------------|-------------|
| Daily dosage | ½ of a tablet  | 1 tablet     | 1 ½ of a tablet | 2 tablets      | 2 ½ of a tablet | 3 tablets   |
